# Supplementary material
Source: PubMed Central journal article supplement (PMC2823384)
Supplement: 97320630004071S1.pdf [file 97320630004071S1.pdf]

**Supplementary material:****Table 1:** List of database categories with number of entries under each category

| <b>S. No</b> | <b>Database Category</b>                                                                                | <b>No. of entities</b> |
|--------------|---------------------------------------------------------------------------------------------------------|------------------------|
| 1            | Total number of indian plant species                                                                    | 105                    |
| 2            | Total number of compounds                                                                               | 144                    |
| 3            | Total number of computed structures<br>(PDB, MOL, tautomers, resonance, conformers, stereo-<br>isomers) | 800                    |
| 4            | Total number of PDB and Mol structures                                                                  | 288                    |
